# Supplementary material for: Productiveness and Berry Quality of New Wine Grape Genotypes Grown under Drought Conditions in a Semi-Arid Wine-Producing Mediterranean Region
Source: MDPI journal article supplement (doi:10.3390/plants11101363), 2022-05-20
Supplement: s1 [file s1]

## Supplementary Material

**Table S1.** Meteorological variables recorded in the years 2018, 2019, 2020 and 2021.

| Phenological periods          | Period year       | ET <sub>0</sub> (mm) | Rainfall (mm) | VPD (Kpa)   | T <sub>MAX</sub> (°C) | T <sub>MED</sub> (°C) | T <sub>MIN</sub> (°C) | RAD <sub>AC</sub> (MJ/M <sup>2</sup> ) | RAD <sub>MAX</sub> (w/m <sup>2</sup> ) | RAD <sub>MED</sub> (w/m <sup>2</sup> ) |
|-------------------------------|-------------------|----------------------|---------------|-------------|-----------------------|-----------------------|-----------------------|----------------------------------------|----------------------------------------|----------------------------------------|
| <b>Year 2018</b>              |                   |                      |               |             |                       |                       |                       |                                        |                                        |                                        |
| Dormancy                      | 11 Dec-6 April    | 228.60               | 107.20        | 0.54        | 15.59                 | 8.18                  | 1.19                  | 1421.93                                | 750.03                                 | 143.04                                 |
| Budbreak-Flowering            | 7 April-22 May    | 186.04               | 55.50         | 0.87        | 21.62                 | 14.62                 | 6.84                  | 1013.87                                | 1126.48                                | 259.43                                 |
| Flowering-Veraison            | 23 May-29 Jul     | 382.68               | 41.30         | 1.69        | 30.25                 | 22.58                 | 13.29                 | 1774.66                                | 1067.37                                | 307.23                                 |
| Veraison-Harvest              | 30 Jul-11 Aug     | 73.52                | 0.40          | 2.20        | 34.85                 | 26.52                 | 16.63                 | 312.51                                 | 975.62                                 | 282.93                                 |
| Harvest-Post harvest          | 12 Aug-2 Oct      | 195.45               | 62.10         | 1.16        | 29.58                 | 22.39                 | 15.55                 | 948.03                                 | 938.40                                 | 214.61                                 |
| Post harvest-Dormancy         | 3 Oct-12 Dec      | 104.77               | 122.00        | 0.49        | 19.17                 | 11.61                 | 5.37                  | 736.61                                 | 658.37                                 | 122.12                                 |
| <b>Total / Annual average</b> |                   | <b>1171.06</b>       | <b>388.50</b> | <b>1.16</b> | <b>25.18</b>          | <b>17.65</b>          | <b>9.81</b>           | <b>6207.61</b>                         | <b>919.38</b>                          | <b>221.56</b>                          |
| <b>Year 2019</b>              |                   |                      |               |             |                       |                       |                       |                                        |                                        |                                        |
| Dormancy                      | 13 Dec-14 April   | 243.64               | 25.50         | 0.57        | 16.94                 | 7.90                  | -0.27                 | 1680.96                                | 754.51                                 | 160.87                                 |
| Budbreak-Flowering            | 15 April-29 May   | 190.63               | 118.20        | 0.92        | 23.04                 | 15.92                 | 8.18                  | 998.64                                 | 1045.22                                | 261.28                                 |
| Flowering-Veraison            | 30 May-1 Aug      | 374.62               | 2.30          | 1.89        | 31.64                 | 23.30                 | 13.02                 | 1723.27                                | 1021.03                                | 317.14                                 |
| Veraison-Harvest              | 2 Aug-27 Aug      | 132.43               | 22.70         | 1.84        | 33.21                 | 25.13                 | 16.13                 | 603.37                                 | 984.58                                 | 273.43                                 |
| Harvest-Post harvest          | 28 Aug-19 Sep     | 79.11                | 147.30        | 1.00        | 27.67                 | 21.39                 | 15.33                 | 375.51                                 | 910.37                                 | 192.28                                 |
| Post harvest-Dormancy         | 20 Sep-12 Dec     | 150.47               | 118.00        | 0.63        | 20.66                 | 13.43                 | 6.58                  | 1026.07                                | 682.05                                 | 143.81                                 |
| <b>Total / Annual average</b> |                   | <b>1170.90</b>       | <b>434.00</b> | <b>1.14</b> | <b>25.53</b>          | <b>17.84</b>          | <b>9.83</b>           | <b>6407.82</b>                         | <b>899.62</b>                          | <b>224.80</b>                          |
| <b>Year 2020</b>              |                   |                      |               |             |                       |                       |                       |                                        |                                        |                                        |
| Dormancy                      | 13 Dec - 7 April  | 187.83               | 204.50        | 0.44        | 16.73                 | 8.96                  | 2.19                  | 1364.04                                | 687.76                                 | 137.22                                 |
| Budbreak-Flowering            | 8 April - 9 May   | 143.29               | 28.90         | 0.74        | 21.94                 | 15.27                 | 8.24                  | 807.27                                 | 1078.32                                | 226.25                                 |
| Flowering-Veraison            | 20 May -29 Jul    | 385.76               | 9.60          | 1.73        | 31.25                 | 22.90                 | 12.79                 | 1884.89                                | 1041.63                                | 312.73                                 |
| Veraison-Harvest              | 30 Jul - 17 Aug   | 99.68                | 0.40          | 2.16        | 35.13                 | 25.83                 | 15.68                 | 461.02                                 | 976.63                                 | 285.97                                 |
| Harvest-Post harvest          | 18 Aug - 14 Sep   | 122.49               | 0.00          | 1.60        | 31.41                 | 22.67                 | 12.58                 | 609.04                                 | 943.93                                 | 256.22                                 |
| Post harvest-Dormancy         | 15 Sep - 8 Dec    | 161.61               | 149.30        | 0.73        | 21.85                 | 13.56                 | 5.76                  | 1101.24                                | 703.23                                 | 152.51                                 |
| <b>Total / Annual average</b> |                   | <b>1100.66</b>       | <b>392.70</b> | <b>1.23</b> | <b>26.38</b>          | <b>18.20</b>          | <b>9.54</b>           | <b>6227.50</b>                         | <b>905.25</b>                          | <b>228.48</b>                          |
| <b>Year 2021</b>              |                   |                      |               |             |                       |                       |                       |                                        |                                        |                                        |
| Dormancy                      | 9 Dec - 10 April  | 207.94               | 95.10         | 0.47        | 16.04                 | 8.42                  | 1.27                  | 1459.27                                | 707.75                                 | 139.65                                 |
| Budbreak-Flowering            | 11 April - 22 May | 158.91               | 71.20         | 0.83        | 22.51                 | 15.45                 | 7.97                  | 863.33                                 | 1079.39                                | 242.00                                 |
| Flowering-Veraison            | 23 May - 26 Jul   | 330.03               | 96.70         | 1.52        | 30.08                 | 22.14                 | 12.79                 | 1625.64                                | 1030.51                                | 294.55                                 |
| Veraison-Harvest              | 27 Jul - 25 Aug   | 142.84               | 0.20          | 1.88        | 33.87                 | 25.50                 | 16.50                 | 658.04                                 | 957.20                                 | 258.56                                 |
| Harvest-Post harvest          | 26 Aug - 22 Sep   | 96.55                | 10.90         | 1.17        | 29.34                 | 21.83                 | 14.53                 | 478.48                                 | 963.68                                 | 201.32                                 |
| Post harvest-Dormancy         | 23 Sep - 27 Nov   | 121.39               | 46.50         | 0.67        | 21.04                 | 13.24                 | 5.96                  | 803.27                                 | 707.32                                 | 143.29                                 |
| <b>Total / Annual average</b> |                   | <b>1057.66</b>       | <b>320.60</b> | <b>1.09</b> | <b>25.48</b>          | <b>17.76</b>          | <b>9.84</b>           | <b>5888.03</b>                         | <b>907.64</b>                          | <b>213.23</b>                          |

TPC, total phenol content in skin and seed. Different letters in the same column indicate significant differences between genotypes (Duncan's multiple range test,  $p < 0.05$ ). †: classification according to the values shown in Supplementary Table 3.

**Table S2.** Supplementary Table 1. Meteorological variables recorded in the years 2018, 2019, 2020 and 2021.

| Grapevine material | Vmc1a12 | Vmc1e11 | Vmc5e9  | Vmc8g6  | Vviv67  | Vvmd5   | Vvmd28  | Vvmd27  |
|--------------------|---------|---------|---------|---------|---------|---------|---------|---------|
| Monastrell         | 119 137 | 188 194 | 214 227 | 139 173 | 357 364 | 223 237 | 242 256 | 177 187 |
| Cabernet S.        | 121 150 | 192 196 | 195 218 | 161 165 | 364 372 | 229 237 | 232 234 | 173 187 |
| Syrah              | 137 150 | 196 206 | 218 222 | 169 173 | 361 381 | 223 229 | 216 226 | 187 189 |
| MC16               | 119 150 | 192 194 | 218 227 | 139 165 | 357 372 | 229 237 | 234 256 | 187 187 |
| MC19               | 137 150 | 188 196 | 214 218 | 161 173 | 364 364 | 237 237 | 232 242 | 177 187 |
| MC72               | 121 137 | 194 196 | 195 227 | 139 165 | 364 372 | 223 229 | 234 256 | 173 177 |
| MC80               | 121 137 | 194 196 | 195 214 | 165 173 | 357 364 | 223 237 | 232 256 | 187 187 |
| MS49               | 137 150 | 188 206 | 214 218 | 173 173 | 357 381 | 229 237 | 226 242 | 187 187 |
| MS104              | 119 150 | 194 196 | 218 227 | 169 173 | 361 364 | 223 223 | 226 256 | 187 187 |

The genetic profile has made it possible to verify that the evaluated material really comes from the crosses of 'Monastrell' with 'Cabernet Sauvignon' (MC) and 'Syrah' (MS), also confirming that they are 6 new and different genotypes.

**Table S3.** Grape phenolic quality groups based on mean data of six years (2012-2017).

| Quality group | TPC skin-seed (mg kg <sup>-1</sup> berry) |      |      | Anthocyanins (mg kg <sup>-1</sup> berry) |      |      |
|---------------|-------------------------------------------|------|------|------------------------------------------|------|------|
|               | Mean                                      | Min. | Max. | Mean                                     | Min. | Max. |
| 1             | 1836                                      | 1550 | 2121 | 985                                      | 820  | 1150 |
| 2             | 2218                                      | 1960 | 2476 | 1381                                     | 1127 | 1635 |
| 3             | 3083                                      | 2942 | 3224 | 2410                                     | 2253 | 2567 |
| 4             | 3465                                      | 3199 | 3731 | 2805                                     | 2592 | 3018 |

TPC, total phenol content in skin and seed. Mean, minimum (Min.) and maximum (Max.) values for each quality group.
